1 **Title: Genome sequencing and assembly of *Tinospora cordifolia* (Giloy) plant**

2 **Authors:** Shruti Mahajan, Abhisek Chakraborty, Titas Sil, Vineet K Sharma\*

3 **Affiliation:** MetaBioSys Group, Dept. of Biological Sciences, Indian Institute of Science Education  
4 and Research Bhopal, Bhopal, Madhya Pradesh, 462066, India

5 \*Corresponding Author email:

6 Vineet K Sharma - vineetks@iiserb.ac.in

7

8 **E-mail addresses of authors:** Shruti Mahajan - shruti17@iiserb.ac.in, Abhisek Chakraborty -  
9 abhisek18@iiserb.ac.in, Titas Sil - titas16@iiserb.ac.in, Vineet K Sharma - vineetks@iiserb.ac.in

## 10 ABSTRACT

11

12 During the ongoing COVID-19 pandemic *Tinospora cordifolia* also known as Giloy gained immense  
13 popularity and use due to its immunity-boosting function and anti-viral properties. *T. cordifolia* is  
14 among the most important medicinal plants that has numerous therapeutic applications in health due  
15 to the production of a diverse array of secondary metabolites. Therefore, to gain genomic insights into  
16 the medicinal properties of *T. cordifolia*, the first genome sequencing was carried out using 10x  
17 Genomics linked read technology and the draft genome assembly comprised of 1.01 Gbp. This is also  
18 the first genome sequenced from the plant family Menispermaceae. We also performed the first  
19 genome size estimation for *T. cordifolia* and was found to be 1.13 Gbp. The deep sequencing of  
20 transcriptome from the leaf tissue was also performed followed by transcriptomic analysis to gain  
21 insights into the gene expression and functions. The genome and transcriptome assemblies were used  
22 to construct the gene set in *T. cordifolia* that resulted in 19,474 coding gene sequences. Further, the  
23 phylogenetic position of *T. cordifolia* was also determined through the construction of a genome-wide  
24 phylogenetic tree using 35 other dicot species and one monocot species as an outgroup species.

## 25 INTRODUCTION

26 *Tinospora cordifolia* is a climbing shrub belonging to the Menispermaceae family that includes more  
27 than 400 plant species of high therapeutic properties [1, 2]. It perhaps originated in Africa in the  
28 Oligocene epoch (28.57 million years ago) and was spread to Asia in the early Miocene epoch (21.54  
29 million years ago) [3]. *T. cordifolia* is found in tropical and sub-tropical regions including India, China,  
30 Sri Lanka, Bangladesh, Myanmar, Thailand, Malaysia, etc. and also known as ‘Giloy’, ‘Amrita’,  
31 ‘Guduchi’, and ‘heart leaved moonseed’ [2]. It is a perennial deciduous dioecious plant with  
32 morphological characteristics of twining branches, succulent stem with papery bark, alternatively  
33 arranged heart-shaped leaves, aerial roots and greenish yellow tiny flowers in the form of racemes  
34 inflorescence [2, 4]. Being a climber, *T. cordifolia* needs a supportive plant like *Jatropha curcas*  
35 (*Jatropha*), *Azadirachta indica* (Neem), *Moringa oleifera* (Moringa), etc. for its growth [4]. These co-  
36 occurring plants also play an important role in enhancing the production of various secondary  
37 metabolites of *T. cordifolia* [4, 5]. Previous reports also indicated the presence of endophytic fungi in  
38 the leaves and the stem of this plant but their ecological significance has yet to be studied [6, 7]. This  
39 plant produces the secondary metabolites in response to the stress conditions and their concentration  
40 also varies based on seasons and its dioecy status [8]. High genetic diversity has been reported in *T.*  
41 *cordifolia* due to the dioecious nature [9-11].

42 The chemical constituents of this plant have been broadly categorized as alkaloids (tinosporine,  
43 magnoflorine, berberine, etc.), terpenoids (tinosporide, furanolactone diterpene, cordifolioside, etc.),  
44 phenolics (lignans, flavonoids, phenylpropanoids etc.), polysaccharides (glucose, xylose, rhamnose,  
45 etc.), steroids (giloinsterol,  $\beta$ -sitosterol, etc.), essential oils and aliphatic compounds along with a few  
46 other compounds such as giloin, tinosporidine, sinapic acid, tinosporone, tinosporic acid, etc. that are  
47 obtained from various parts of the plant [12, 13]. A terpene tinosporaside and an alkaloid berberine  
48 were found to be the most dominant compounds in *T. cordifolia* and suggested to use them as its  
49 chemical biomarkers [14, 15]. The bitter taste of *T. cordifolia* is due to the presence of tinosporic acid,  
50 tinosporol, giloin, giloinin, tinosporide, cordifolide, tinosporin and a few other compounds [12]. A  
51 study reported that among the two species of *Tinospora* (i.e. *T. cordifolia* and *T. sinensis*), *T. cordifolia*  
52 produces three times higher concentration of berberine than *T. sinensis*, and thus the former is preferred  
53 in therapeutics [16].

54 The bioactive compounds found in *T. cordifolia* have known biological properties such as anti-pyretic,  
55 anti-diabetic, anti-inflammatory, anti-microbial, anti-allergic, anti-oxidant, anti-diabetic, anti-toxic,  
56 anti-arthritis, anti-osteoporotic, anti-HIV, anti-cancer, hepatoprotective, anti-malarial, and also in  
57 immunomodulation etc. [17, 18]. These properties make this species useful in the traditional treatment  
58 of several ailments including fevers, cough, diabetes, general debility, ear pains, jaundice, asthma,  
59 heart diseases, burning sensation, bone fracture, urinary problems, chronic diarrhoea, dysentery,  
60 leucorrhoea, skin diseases, cancer, helminthiasis, leprosy and rheumatoid arthritis. Further pre-clinical  
61 and clinical studies have been carried out to indicate its potential to treat leucopenia induced by breast  
62 cancer chemotherapy, hepatic disorders, post-menopausal syndrome, obstructive jaundice, etc. [19,  
63 20]. These diverse and important therapeutic applications make it a species of interest for a broad  
64 scientific community. Interestingly, this Giloy plant has gained tremendous therapeutic interest and  
65 significance during the recent and ongoing COVID-19 pandemic [21].

66 However, despite the widely known and important medicinal properties of this plant its genome  
67 assembly is yet unavailable. A preliminary study reported the transcriptome (482 Mbp data) of this  
68 species from leaf and stem tissues using 454 GS-FLX pyrosequencing [22]. A recent karyological  
69 study reported  $2n=26$  as the chromosome number in *T. cordifolia*, which was also supported by the  
70 earlier studies [23-25]. Thus, to uncover the genomic basis of its medicinal properties and for further  
71 exploration of its therapeutic potential, we carried out the first genome sequencing and assembly of *T.*  
72 *cordifolia* using 10x Genomics linked reads. This is the first draft genome assembly of *T. cordifolia*  
73 which is also the first genome sequenced so far from the medicinally important genus *Tinospora* and  
74 its family [26]. We also carried out a comprehensive deep sequencing and assembly of the leaf

75 transcriptome using Illumina reads. The genome-wide phylogenetic analysis was also carried out for  
76 *T. cordifolia* with other dicot species and a monocot species as an outgroup to determine its  
77 phylogenetic position.

78

## 79 **METHODS**

### 80 **Sample collection, species identification, nucleic acids extraction and sequencing**

81 The plant was brought from a nursery in Bhopal, Madhya Pradesh, India (23.2599° N, 77.4126° E).  
82 DNA and RNA extraction were carried out using a cleaned leaf, which was homogenized in liquid  
83 nitrogen. The TRIzol reagent was used for RNA extraction [27]. For genomic DNA extraction, the  
84 powdered leaf was washed with 70% ethanol and distilled water in order to eliminate any such  
85 compounds that may hinder the extraction process and employed CTAB based Carlson lysis buffer for  
86 the isolation [28]. Two genes: one nuclear gene and one chloroplast gene (Internal Transcribed Spacer  
87 and Maturase K, respectively) were used for the species identification. These genes were amplified  
88 and sequenced at in-house sanger sequencing facility. The TruSeq Stranded Total RNA library  
89 preparation kit with Ribo-Zero Plant workflow (Illumina, Inc., USA) was deployed for preparing the  
90 transcriptomic library. The genomic library for linked reads was prepared using Gel Bead kit and  
91 Chromium Genome library kit on a Chromium Controller instrument (10x Genomics, CA, USA). The  
92 quality of both the libraries (transcriptomic and genomic) was checked on TapeStation 4150 (Agilent,  
93 Santa Clara, CA) and sequenced on an Illumina platform, NovaSeq 6000 (Illumina, Inc., USA) for  
94 producing paired end reads. The comprehensive DNA and RNA extraction procedure is mentioned in  
95 **Supplementary Text S1.**

96

### 97 **Genome assembly**

98 An array of Python scripts (<https://github.com/ucdavis-bioinformatics/proc10xG>) were used to remove  
99 the barcode sequences from the raw reads. SGA-preqc was employed for genome size estimation of *T.*  
100 *cordifolia* using k-mer count distribution method (**Supplementary text S2**) [29]. The de novo  
101 assembly was generated by Supernova assembler v.2.1.1 (with maxreads=all options and other default  
102 settings) using 499.36 million raw reads [30]. The ‘pseudohap2’ style in Supernova mkoutput was  
103 implemented to assemble haplotype-phased genome.

104 The barcodes of linked reads were processed using Longranger basic v2.2.2  
105 (<https://support.10xgenomics.com/genome-exome/software/pipelines/latest/installation>) and these  
106 processed reads were used by Tigmint v1.2.1 to rectify the mis-assemblies present in Supernova  
107 assembled genome [31]. AGOUTI v0.3.3 with quality-filtered transcriptome reads was used to  
108 accomplish the initial scaffolding [32]. In order to construct a more contiguous assembly ARCS v1.1.1  
109 with its default parameters was used to provide additional scaffolding and enhance the contiguity of  
110 the genome assembly [33]. Using a bloom filter-based method and k-mer value ranging from 30 to  
111 120 with 10 bp interval, Sealer v2.1.5 used the linked reads (barcode processed) for gap-closing in the  
112 assembly [34]. Performing scaffolding multiple times could give rise to local mis-assemblies, small  
113 indels or distinct base errors which were overwhelmed using Pilon v1.23 that utilized the linked reads  
114 (barcode-processed) to increase the assembly quality [35]. The completeness of genome assembly was  
115 evaluated with BUSCO v4.1.4 which used embryophyte\_odb10 database for the assessment [36]. The  
116 additional information about the post-processing of genome assembly is provided in **Supplementary**  
117 **Text S2**.

#### 118 **Transcriptome assembly**

119 The de novo transcriptome assembly was carried out using RNA-Seq data generated in this study.  
120 Trimmomatic v.0.38 was used for processing of raw data reads i.e., adapter removal and quality-  
121 filtration [**Supplementary Text S2**] [37]. The de novo transcriptome assembly was constructed using  
122 Trinity v2.9.1 with strand-specific option and other default parameters using the processed paired-end  
123 reads [38]. A Perl script offered in Trinity software package was utilized to evaluate the assembly  
124 statistics.

#### 125 **Genome annotation**

126 The genome annotation was achieved on the polished assembly (length  $\geq 1,000$  bp). This genome was  
127 used by RepeatModeler v2.0.1 to construct a *de novo* repeat library [39]. The clustering of obtained  
128 repeat sequences was performed using CD-HIT-EST v4.8.1 with sequence identity as 90% and 8 bp  
129 seed size [40]. Using the repeat library, RepeatMasker v4.1.0 (RepeatMasker Open-4.0,  
130 <http://www.repeatmasker.org>) was used to soft-mask the genome that was used for the construction of  
131 gene set. MAKER pipeline that employs *ab initio*-based gene prediction programs as well as evidence-  
132 based approaches for prediction of final gene model was used for genome annotation [41]. As an  
133 empirical evidence in MAKER pipeline the de novo transcriptome assembly of *T. cordifolia* and  
134 protein sequences of its phylogenetically closer species *Beta vulgaris* (belonging to plant order  
135 Caryophyllales) were used. The *ab initio* gene prediction, evidence-based alignments and polishing of

136 alignments were achieved using AUGUSTUS v3.2.3, BLAST and Exonerate v2.2.0, respectively with  
137 the MAKER pipeline [42, 43]. The completeness of the coding gene set was also assessed using  
138 BUSCO v4.1.4 embryophyte\_odb10 database. The tandem repeats detection, de novo tRNAs  
139 prediction, de novo rRNAs prediction and miRNAs identification (homology based) were performed  
140 using Tandem Repeat Finder (TRF) v4.09, tRNAscan-SE v2.0.7, Barrnap v0.9  
141 (<https://github.com/tseemann/barrnap>) and miRBase database, respectively [44-46]. The detailed  
142 information about genome annotation is provided in **Supplementary Text S3**.

### 143 **Orthogroups identification**

144 Among all the eudicot species accessible on Ensembl Plants release 48, a total of 35 species were  
145 selected by choosing one species from each offered genus. The 35 eudicot species along with an  
146 outgroup species, *Zea mays* were used for the identification of orthologs [47]. The 36 selected species  
147 along with the outgroup species were - *Actinidia chinensis*, *Arabidopsis thaliana*, *Arabis alpina*, *Beta*  
148 *vulgaris*, *Brassica napus*, *Camelina sativa*, *Cannabis sativa* female, *Capsicum annuum*, *Citrullus*  
149 *lanatus*, *Citrus clementina*, *Coffea canephora*, *Corchorus capsularis*, *Cucumis melo*, *Cynara*  
150 *cardunculus*, *Daucus carota*, *Glycine max*, *Gossypium raimondii*, *Helianthus annuus*, *Ipomoea*  
151 *triloba*, *Lupinus angustifolius*, *Malus domestica* Golden, *Manihot esculenta*, *Medicago truncatula*,  
152 *Nicotiana attenuata*, *Olea europaea* var. *sylvestris*, *Phaseolus vulgaris*, *Pistacia vera*, *Populus*  
153 *trichocarpa*, *Prunus avium*, *Rosa chinensis*, *Solanum tuberosum*, *Theobroma cacao* Matina 1-6,  
154 *Trifolium pratense*, *Vigna angularis*, *Vitis vinifera*, and *Zea mays*. The orthogroups were formed using  
155 the proteome files of 35 selected eudicot species along with *Zea mays* and MAKER retrieved protein  
156 sequences of *T. cordifolia*. Among all the protein sequences, the longest isoforms were retrieved for  
157 all the species and provided to OrthoFinder v2.4.1 for orthogroups construction [48].

### 158 **Orthologous gene set construction**

159 The orthogroups comprising genes from all 37 species were retrieved from all the identified  
160 orthogroups. KinFin v1.0 was used to increase the genes in one-to-one orthogroups that identified and  
161 extracted fuzzy one-to-one orthogroups among these retrieved orthogroups [49]. In cases where  
162 multiple genes were present for a single species in any orthogroup, the longest gene among them was  
163 selected as representative.

### 164 **Phylogenetic tree construction**

165 MAFFT v7.480 was used to discretely align all the identified fuzzy one-to-one orthogroups for  
166 construction of the phylogenetic tree [50]. The multiple sequence alignments were trimmed to

167 eradicate empty sites, and the alignments were concatenated using BeforePhylo v0.9.0  
168 (<https://github.com/qiyunzhu/BeforePhylo>). The concatenated alignments were used by RAxML  
169 v8.2.12, based on rapid hill climbing algorithm, to create the maximum likelihood-based phylogenetic  
170 tree (100 bootstrap values and amino acid substitution model ‘PROTGAMMAAUTO’) [51].

171

## 172 **RESULTS**

### 173 **Sampling and Sequencing of *T. cordifolia* genome and transcriptome**

174 The *T. cordifolia* plant was brought from a plant nursery in Bhopal, Madhya Pradesh, India and the  
175 DNA and RNA extracted from leaf was used for sequencing. Two marker genes: ITS and MatK were  
176 amplified and sequenced at in-house sanger sequencing facility for the species identification  
177 (**Supplementary Text S1**). The sequenced reads of these marker genes were aligned using BLASTN  
178 that showed the highest identity (98.32% for ITS and 99.41% for MatK) with sequences of *T. cordifolia*  
179 available at NCBI database and confirmed the plant species as *T. cordifolia*. We generated 79.4 Gbp  
180 of genomic data and 34.7 Gbp of transcriptomic data for the genomic assembly and analysis of *T.*  
181 *cordifolia* (**Table 1 and Supplementary Tables S1-S2**). The barcode sequences were removed from  
182 the raw reads and high-quality reads were selected for further analysis. The de novo assembly  
183 generated by Supernova assembler v.2.1.1 using 499.36 million raw reads [30], and the ‘pseudohap2’  
184 style in Supernova mkoutput was implemented to assemble haplotype-phased genome. Since the  
185 genome size was not known for this plant, we performed the first genome size estimation for *T.*  
186 *cordifolia* using SGA-preqc processed linked reads, and the genome size was estimated to be 1.13  
187 Gbp. Considering this genome size, the sequenced genomic data amounts to 70.2x genome coverage.  
188 After scaffolding, mis-assemblies rectification, gap-filling and polishing *T. cordifolia* genome  
189 assembly resulted in 1.01 Gbp assembly size ( $\geq 2,000$  bp) as the final draft. The %GC of the assembled  
190 genome was 35.12%, and a total of 56,342 scaffolds were obtained having the N50 of 50.2 Kbp (**Table**  
191 **1 and Supplementary Table S3**). The BUSCO completeness was 78.9% in the final polished *T.*  
192 *cordifolia* genome assembly (**Supplementary Table S4**). The *de novo* transcriptome assembly was  
193 constructed using Trinity v2.9.1 with strand-specific option and other default parameters using the  
194 processed paired end reads. The Trinity software assembled 2,764,154 bp of *de novo* transcriptome  
195 assembly, and a total of 8,208 transcripts were predicted in the transcriptome assembly.

### 196 **Annotation of genome and gene set formation**

197 The final polished genome assembly was analyzed by RepeatModeler v2.0.1 to construct a *de novo*  
198 repeat library consisting of 1,918 repeat families that were further clustered into 1,584 representative  
199 repeat family sequences. The repetitive sequences in *T. cordifolia* genome were predicted using  
200 RepeatMasker v4.1.0 and obtained 75.15% of repetitive sequences in this genome. Among these  
201 repetitive sequences, 73.75% were characterized as interspersed repeats comprising 32.12%  
202 retroelements (29.15% of LTR repeats), 2.48% DNA transposons and 39.14% unclassified repeats.  
203 The LTR repeats consisted of 25.38% Gypsy/DIRS1 and 3.22% Ty1/Copia elements. About 3.87% of  
204 the genome comprised of simple repeats found using TRF v4.09. The interspersed and simple  
205 repetitive sequences collectively comprised ~78% of the total genome. 392 hairpin miRNAs, 1,344  
206 rRNAs and 2,186 tRNAs (decoding standard amino acids) were also predicted among the non-coding  
207 RNAs.

208 The soft-masked genome (generated using RepeatMasker) was used for the construction of gene set  
209 using the MAKER pipeline that employs *ab initio*-based gene prediction programs and evidence-based  
210 approaches for prediction of final gene model [41]. The *de novo* transcriptome assembly of *T.*  
211 *cordifolia* and protein sequences of its phylogenetically closer species *Beta vulgaris* (belonging to  
212 plant order Caryophyllales) were used as an empirical evidence in MAKER pipeline. The *ab initio*  
213 gene prediction, evidence-based alignments, and alignments polishing were achieved using  
214 AUGUSTUS v3.2.3, BLAST and Exonerate v2.2.0, respectively in the MAKER pipeline that  
215 predicted 19,730 coding sequences in the genome assembly [42, 43]. These coding genes were filtered  
216 based on length  $\geq 150$  bp and resulted in 19,474 coding gene sequences. The completeness of the coding  
217 gene set was assessed using BUSCO v4.1.4 embryophyte\_odb10 database on the final gene set that  
218 showed 70% of the complete and fragmented BUSCOs to be present in the coding gene set.

### 219 **Phylogenetic analysis of *T. cordifolia***

220 A total of 35 species were selected from the eudicot species accessible on Ensembl Plants release 48  
221 by choosing one species from each offered genus, and included *Actinidia chinensis*, *Arabidopsis*  
222 *thaliana*, *Arabis alpina*, *Beta vulgaris*, *Brassica napus*, *Camelina sativa*, *Cannabis sativa* female,  
223 *Capsicum annuum*, *Citrullus lanatus*, *Citrus clementina*, *Coffea canephora*, *Corchorus capsularis*,  
224 *Cucumis melo*, *Cynara cardunculus*, *Daucus carota*, *Glycine max*, *Gossypium raimondii*, *Helianthus*  
225 *annuus*, *Ipomoea triloba*, *Lupinus angustifolius*, *Malus domestica* Golden, *Manihot esculenta*,  
226 *Medicago truncatula*, *Nicotiana attenuata*, *Olea europaea* var. *sylvestris*, *Phaseolus vulgaris*, *Pistacia*  
227 *vera*, *Populus trichocarpa*, *Prunus avium*, *Rosa chinensis*, *Solanum tuberosum*, *Theobroma cacao*  
228 *Matina 1-6*, *Trifolium pratense*, *Vigna angularis*, and *Vitis vinifera*. Thus, the 36 selected species along



229 with one outgroup species (*Zea mays*), and including *T. cordifolia* were used to detect 162,809  
230 orthogroups using the protein sequences retrieved from 37 species.

231 The phylogenetic tree (maximum likelihood-based) was constructed using 454 fuzzy one-to-one  
232 orthogroups predicted by KinFin v1.0 across the 37 species. The missing or unknown values were  
233 predicted by aligning, concatenating and filtering all the fuzzy one-to-one orthogroups. The alignment  
234 data was filtered resulting in 422,034 alignment positions. The phylogenetic tree was constructed using  
235 this alignment data (filtered) of *T. cordifolia* along with the 35 dicot species available on Ensembl  
236 Plants release 48 and an outgroup species, *Zea mays* (**Figure 2**). The resultant phylogenetic position  
237 of *T. cordifolia* was observed as a separate clade from all the other eudicots and monocot outgroup  
238 plausibly because the clade to which *T. cordifolia* belongs is considered as basal eudicots that diverged  
239 very early from the other eudicots [52, 53].

240

## 241 **DISCUSSION**

242 *T. cordifolia* is known to produce several phytochemicals as secondary metabolites such as alkaloids,  
243 terpenoids, tannins, phenolic compounds, steroids, flavonoids, phytosterols, volatile oils, etc. that are  
244 responsible for its diverse medicinal properties like anti-oxidant, immunomodulatory, anti-microbial,  
245 anti-viral, anticancer, anti-pyretic, anti-inflammatory, hepatoprotective, neuroprotective, anti-  
246 osteoporotic, anti-toxic, anti-diabetic, anti-arthritis, anti-ulcer, etc. [18, 54] (**Figure 1**). Tinosporaside,  
247 tembetarine and phenolic compounds were suggested to responsible for its anti-inflammatory, anti-  
248 diabetic and anti-oxidant activities, respectively [55-57]. Likewise, a few other compounds from  
249 *Tinospora cordifolia* were found accountable for its various activities [58-62]. Being a medicinally  
250 important herb with therapeutic applications in multiple health conditions, the genome and  
251 transcriptome sequencing of *Tinospora cordifolia* was much needed to gain insights into its genetic  
252 information, transcriptome, and functional analysis of pathways associated with the secondary  
253 metabolites production responsible for its medicinal properties. This study reported the first draft  
254 genome assembly of *T. cordifolia* which is also the first genome from the genus *Tinospora* and its  
255 family. This study also deliberates the genome assembly, transcriptome assembly, gene set and  
256 phylogeny of *T. cordifolia* that will help in understanding the medicinal properties of this multipurpose  
257 plant. The linked read sequencing has recently emerged as a promising technology to significantly  
258 increase the contiguity in the genome assembly by increasing scaffold N50 and decreasing the number  
259 of scaffolds compared to short read technology, and was successfully used for the sequencing of *T.*  
260 *cordifolia* [63].

261 *T. cordifolia* belongs to order Ranunculales and our phylogenetic tree finds its position as a distinct  
262 branch separate from all the other eudicots. This could be due to the early-divergence of order  
263 Ranunculales from all the other core eudicots. Order Ranunculales is considered as an early-diverging  
264 eudicot order and is among a few other eudicot orders (collectively known as basal eudicots) that are  
265 found to be sister lineage to the core eudicots [52, 64, 65], which was also observed in the case of *T.*  
266 *cordifolia* that showed early divergence from all other dicot species (**Figure 2**). Thus, the early  
267 divergence could be the reason for its distinct position relative to the other eudicots and monocot  
268 species. The correctness of this phylogeny is supported by the fact that the species belonging to the  
269 same clade shared common nodes, e.g., *Arabidopsis thaliana*, *Camelina sativa*, *Brassica napus*, and  
270 *Arabis alpina* shared the same clade because they belong to the same order Brassicales, and similarly  
271 *Gossypium raimondii*, *Theobroma cacao* Matina 1-6 and *Corchorus capsularis* belong to order  
272 Malvales and shared the same node in the phylogeny. Likewise, the members of order Fabales and  
273 order Solanales also shared their respective nodes.

274

## 275 **CONCLUSION**

276 Thus, as apparent from the above literature-based evidences on the medicinal and pharmaceutical  
277 properties of this plant, the availability of *T. cordifolia* genome will help in bridging the missing link  
278 between its genomic and medicinal properties and provide leads for exploring the genomic basis of  
279 these properties. It will also aid in various comparative genomic studies and will act as a reference for  
280 the future species sequenced from its genus and family. It will also help in the genome-wide  
281 phylogenetic assessments as well as evolutionary analyses on this species. The knowledge of  
282 mechanisms and pathways involved in production of its numerous medicinally important secondary  
283 metabolites will help in better exploitation of these pathways and resultant metabolites for medicinal  
284 purposes and therapeutic applications.

285

## 286 **LIST OF ABBREVIATIONS**

|     |       |                                  |
|-----|-------|----------------------------------|
| 287 | COVID | Corona Virus Disease             |
| 288 | Gbp   | Giga base pair                   |
| 289 | RNA   | Ribonucleic Acid                 |
| 290 | Mbp   | Mega base pair                   |
| 291 | DNA   | Deoxyribonucleic acid            |
| 292 | CTAB  | Cetyl trimethyl ammonium bromide |

|     |        |                                               |
|-----|--------|-----------------------------------------------|
| 293 | tRNA   | Transfer RNA                                  |
| 294 | rRNA   | Ribosomal RNA                                 |
| 295 | miRNA  | micro-RNA                                     |
| 296 | TRF    | Tandem repeat finder                          |
| 297 | ITS    | Internal transcribed spacer                   |
| 298 | MatK   | Maturase K                                    |
| 299 | BLAST  | Basic Local Alignment Search Tool             |
| 300 | BLASTN | Nucleotide BLAST                              |
| 301 | NCBI   | National Center for Biotechnology Information |
| 302 | bp     | Base pair                                     |
| 303 | kbp    | Kilo base pair                                |
| 304 | LTR    | Long terminal repeats                         |
| 305 | DIRS1  | Dictyostelium intermediate repeat sequence 1  |

306

### 307 **COMPETING INTERESTS**

308 The authors declare no competing financial and non-financial interest.

### 309 **AUTHORS' CONTRIBUTIONS**

310 VKS perceived and coordinated the project and collected the plant sample. SM extracted the nucleic  
311 acids (DNA and RNA) from the collected sample, prepared the DNA and RNA samples for  
312 sequencing, and carried out the species identification assay. AC and VKS conceived the computational  
313 outline of the study. AC accomplished all the computational analysis presented in the study. SM, AC  
314 and VKS interpreted the results. SM and AC constructed the figures. SM, AC, TS and VKS wrote the  
315 manuscript. All the authors have read and approved the final version of the manuscript.

### 316 **ACKNOWLEDGEMENT**

317 SM and AC acknowledge Council of Scientific and Industrial Research (CSIR) for supporting research  
318 fellowships. TS thanks the Department of Science and Technology and IISc Bangalore for providing  
319 the KVPY scholarship. The authors also thank IISER Bhopal for providing the intramural research  
320 funds.

321 **DATA AVAILABILITY**

322 The raw data has been submitted on NCBI database with BioProject accession number

323 PRJNA749156, Biosample accession SAMN20355817, and SRA accessions SRR15221491 and

324 SRR15221490.

325 **FIGURES**

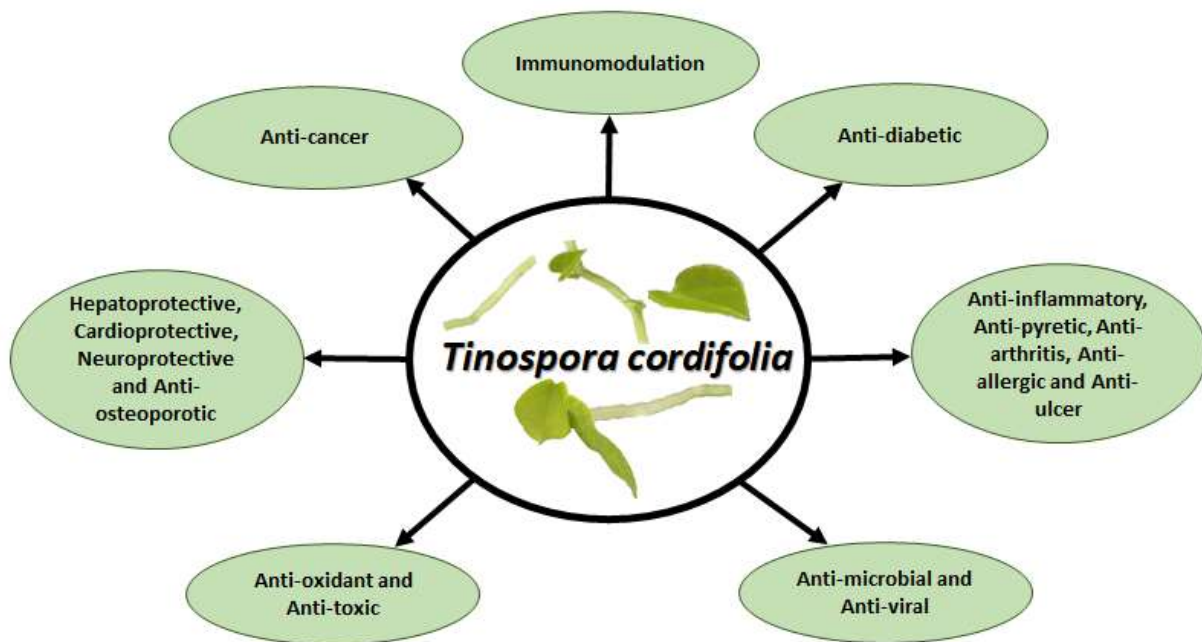

326

327 **Figure 1.** Medicinal properties of *Tinospora cordifolia*

328

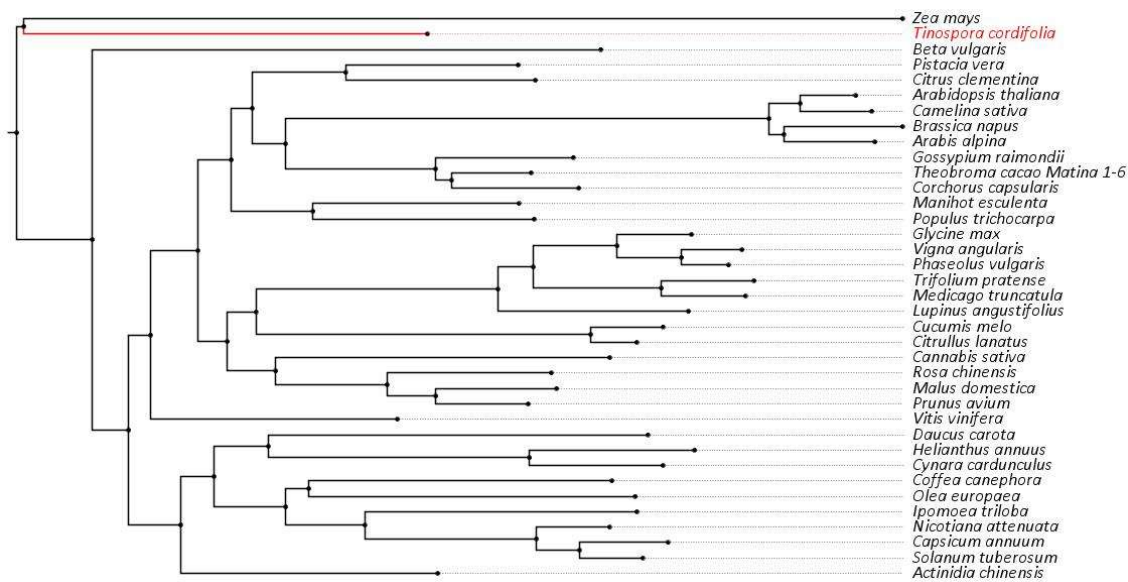

329

330 **Figure 2.** Phylogenetic tree describing the phylogenetic position of *Tinospora cordifolia* with other  
 331 species

332 **TABLE**

333 **Table 1.** Summary of genome and transcriptome assemblies

| Parameter                              | Value     |
|----------------------------------------|-----------|
| Genomic data generated (Gbp)           | 79.4      |
| Estimated genome size (Gbp)            | 1.13      |
| Estimated genome coverage (x)          | 70.2      |
| Size of draft genome assembly (Gbp)    | 1.01      |
| N50 of genome assembly (Kbp)           | 50.2      |
| GC content (%)                         | 35.12     |
| Percentage of repetitive sequences (%) | 75.15     |
| Total coding sequences                 | 19,474    |
| Transcriptome data generated (Gbp)     | 34.7      |
| Size of transcriptome assembly (bp)    | 2,764,154 |
| Total transcripts identified           | 8,208     |

334

335

336 **REFERENCES**

337

- 338 1. Thulasi, M.M. and R.K. Vasu, *The Menispermaceae family of plants and its action against infectious*  
 339 *diseases: A review*. Mapana Journal of Sciences, 2020. **19**(2): p. 33-72.  
 340 2. Devi, G., *MEDICINAL PLANT: GILOY*. 2020.  
 341 3. Lian, L., et al., *Re-delimitation of Tinospora (Menispermaceae): Implications for character evolution*  
 342 *and historical biogeography*. Taxon, 2019. **68**(5): p. 905-917.

- 343 4. Mittal, J., M.M. Sharma, and A. Batra, *Tinospora cordifolia: a multipurpose medicinal plant-A*. Journal  
344 of Medicinal Plants, 2014. **2**(2).
- 345 5. Sonavale, R., et al. *EFFECT OF EDAPHIC FACTORS ON MAJOR SECONDARY METABOLITES OF*  
346 *TINOSPORA CORDIFOLIA AND NEEM GUDUCHI WITH RESPECT TO THEIR IMMUNOMODULATORY*  
347 *EFFECT*. in *International Conference on Contemporary Research in Chemical and Life Science*. 2015.
- 348 6. Mishra, Y., et al., *In vivo and in vitro histological localization of endophytic fungi in Tinospora*  
349 *cordifolia (Willd.) Miers ex Hook F. & Thomas*. Journal of Applied Research on Medicinal and  
350 Aromatic Plants, 2015. **2**(1): p. 30-33.
- 351 7. Kapoor, N. and S. Saxena, *Endophytic fungi of Tinospora cordifolia with anti-gout properties*. *3*  
352 *Biotech*, 2018. **8**(6): p. 1-6.
- 353 8. Choudhry, N., et al., *Impact of seasons and dioecy on therapeutic phytoconstituents of Tinospora*  
354 *cordifolia, a Rasayana drug*. *BioMed research international*, 2014. **2014**.
- 355 9. Kalpesh, I. and J. Mohan, *Assessment of genetic diversity in medicinal climber of Tinospora cordifolia*  
356 *(Willd.) Miers (Menispermaceae) from Gujarat, India*. *Asian Journal of Biotechnology*, 2009. **1**(3): p.  
357 93-103.
- 358 10. Paliwal, R., et al., *Development of genomic simple sequence repeats (g-SSR) markers in Tinospora*  
359 *cordifolia and their application in diversity analyses*. *Plant Gene*, 2016. **5**: p. 118-125.
- 360 11. Lade, S., et al., *Diversity in a widely distributed dioecious medicinal plant, Tinospora cordifolia (Willd.)*  
361 *Miers. ex. Hook F. and Thomas*. *Current Science*, 2018. **114**(7): p. 1520.
- 362 12. Singh, D. and P.K. Chaudhuri, *Chemistry and pharmacology of Tinospora cordifolia*. *Natural product*  
363 *communications*, 2017. **12**(2): p. 1934578X1701200240.
- 364 13. Sharma, P., et al., *The chemical constituents and diverse pharmacological importance of Tinospora*  
365 *cordifolia*. *Heliyon*, 2019. **5**(9): p. e02437.
- 366 14. Gahlaut, A., A. Gothwal, and R. Dabur, *TLC based analysis of allelopathic effects on tinosporoside*  
367 *contents in Tinospora cordifolia*. *J. Chem. Pharm. Res*, 2012. **4**: p. 3082-3088.
- 368 15. Choudhary, N., M. Siddiqui, and S. Khatoon, *Pharmacognostic evaluation of Tinospora cordifolia*  
369 *(Willd.) Miers and identification of biomarkers*. 2014.
- 370 16. Srinivasan, G., et al., *HPLC estimation of berberine in Tinospora cordifolia and Tinospora sinensis*.  
371 *Indian journal of pharmaceutical sciences*, 2008. **70**(1): p. 96.
- 372 17. Upadhyay, A.K., et al., *Tinospora cordifolia (Willd.) Hook. f. and Thoms.(Guduchi)–validation of the*  
373 *Ayurvedic pharmacology through experimental and clinical studies*. *International journal of Ayurveda*  
374 *research*, 2010. **1**(2): p. 112.
- 375 18. Saha, S. and S. Ghosh, *Tinospora cordifolia: One plant, many roles*. *Ancient science of life*, 2012.  
376 **31**(4): p. 151.
- 377 19. Sinha, K., et al., *Tinospora cordifolia (Guduchi), a reservoir plant for therapeutic applications: A*  
378 *Review*. 2004.
- 379 20. Devi, P., *Role of Tinospora cordifolia in metabolic health disorders: An updated review*. *Himalayan*  
380 *Journal of Health Sciences*, 2021: p. 15-23.
- 381 21. Chopra, D., B. Bhandari, and S. Dwivedi, *Beneficial role of Indian medicinal plants in COVID-19*. *MGM*  
382 *Journal of Medical Sciences*, 2021. **8**(2): p. 166.
- 383 22. Singh, R., et al., *De novo transcriptome sequencing facilitates genomic resource generation in*  
384 *Tinospora cordifolia*. *Functional & integrative genomics*, 2016. **16**(5): p. 581-591.
- 385 23. Abraham, A., *Chromosome number in Tinospora*. *Current Science*, 1942. **11**(7): p. 282-282.
- 386 24. Mathew, P. *Studies on the Menispermaceae*. in *Proceedings of the Indian Academy of Sciences-*  
387 *Section B*. 1958. Springer.
- 388 25. Santra, I., T. Halder, and B. Ghosh, *Research article Somatic and gametic chromosomal*  
389 *characterization with fluorescence banding of Giloy (Tinospora cordifolia): A berberine synthesizing*  
390 *important medicinal plant of India*. *Caryologia. International Journal of Cytology, Cytosystematics*  
391 *and Cytogenetics*, 2021.
- 392 26. Haque, M.A., I. Jantan, and S.N.A. Bukhari, *Tinospora species: An overview of their modulating effects*  
393 *on the immune system*. *Journal of ethnopharmacology*, 2017. **207**: p. 67-85.

- 394 27. Johnson, M.T., et al., *Evaluating methods for isolating total RNA and predicting the success of*  
395 *sequencing phylogenetically diverse plant transcriptomes*. Plos one, 2012. **7**(11): p. e50226.
- 396 28. Gaytán-Oyarzún, C.S.-H.a.J.C., *Two mini-preparation protocols to DNA extraction from plants with*  
397 *high polysaccharide and secondary metabolites*. African Journal of Biotechnology, 2006. **5** (20): p.  
398 1864-1867.
- 399 29. Simpson, J.T. and R. Durbin, *Efficient de novo assembly of large genomes using compressed data*  
400 *structures*. Genome research, 2012. **22**(3): p. 549-556.
- 401 30. Weisenfeld, N.I., et al., *Direct determination of diploid genome sequences*. Genome research, 2017.  
402 **27**(5): p. 757-767.
- 403 31. Jackman, S.D., et al., *Tigmint: correcting assembly errors using linked reads from large molecules*.  
404 BMC bioinformatics, 2018. **19**(1): p. 1-10.
- 405 32. Zhang, S.V., L. Zhuo, and M.W. Hahn, *AGOUTI: improving genome assembly and annotation using*  
406 *transcriptome data*. GigaScience, 2016. **5**(1): p. s13742-016-0136-3.
- 407 33. Yeo, S., et al., *ARCS: scaffolding genome drafts with linked reads*. Bioinformatics, 2018. **34**(5): p. 725-  
408 731.
- 409 34. Paulino, D., et al., *Sealer: a scalable gap-closing application for finishing draft genomes*. BMC  
410 bioinformatics, 2015. **16**(1): p. 1-8.
- 411 35. Walker, B.J., et al., *Pilon: an integrated tool for comprehensive microbial variant detection and*  
412 *genome assembly improvement*. PloS one, 2014. **9**(11): p. e112963.
- 413 36. Simão, F.A., et al., *BUSCO: assessing genome assembly and annotation completeness with single-*  
414 *copy orthologs*. Bioinformatics, 2015. **31**(19): p. 3210-3212.
- 415 37. Bolger, A.M., M. Lohse, and B. Usadel, *Trimmomatic: a flexible trimmer for Illumina sequence data*.  
416 Bioinformatics, 2014. **30**(15): p. 2114-2120.
- 417 38. Haas, B.J., et al., *De novo transcript sequence reconstruction from RNA-seq using the Trinity platform*  
418 *for reference generation and analysis*. Nature protocols, 2013. **8**(8): p. 1494-1512.
- 419 39. Flynn, J.M., et al., *RepeatModeler2 for automated genomic discovery of transposable element*  
420 *families*. Proceedings of the National Academy of Sciences, 2020. **117**(17): p. 9451-9457.
- 421 40. Fu, L., et al., *CD-HIT: accelerated for clustering the next-generation sequencing data*. Bioinformatics,  
422 2012. **28**(23): p. 3150-3152.
- 423 41. Campbell, M.S., et al., *Genome annotation and curation using MAKER and MAKER-P*. Current  
424 protocols in bioinformatics, 2014. **48**(1): p. 4.11. 1-4.11. 39.
- 425 42. Altschul, S.F., et al., *Basic local alignment search tool*. Journal of molecular biology, 1990. **215**(3): p.  
426 403-410.
- 427 43. Stanke, M., et al., *AUGUSTUS: ab initio prediction of alternative transcripts*. Nucleic acids research,  
428 2006. **34**(suppl\_2): p. W435-W439.
- 429 44. Benson, G., *Tandem repeats finder: a program to analyze DNA sequences*. Nucleic acids research,  
430 1999. **27**(2): p. 573-580.
- 431 45. Griffiths-Jones, S., et al., *miRBase: tools for microRNA genomics*. Nucleic acids research, 2007.  
432 **36**(suppl\_1): p. D154-D158.
- 433 46. Chan, P.P. and T.M. Lowe, *tRNAscan-SE: searching for tRNA genes in genomic sequences*, in *Gene*  
434 *Prediction*2019, Springer. p. 1-14.
- 435 47. Bolser, D., et al., *Ensembl plants: integrating tools for visualizing, mining, and analyzing plant*  
436 *genomics data*, in *Plant bioinformatics*2016, Springer. p. 115-140.
- 437 48. Emms, D.M. and S. Kelly, *OrthoFinder: phylogenetic orthology inference for comparative genomics*.  
438 Genome biology, 2019. **20**(1): p. 1-14.
- 439 49. Laetsch, D.R. and M.L. Blaxter, *KinFin: software for Taxon-Aware analysis of clustered protein*  
440 *sequences*. G3: Genes, Genomes, Genetics, 2017. **7**(10): p. 3349-3357.
- 441 50. Katoh, K. and D.M. Standley, *MAFFT multiple sequence alignment software version 7: improvements*  
442 *in performance and usability*. Molecular biology and evolution, 2013. **30**(4): p. 772-780.
- 443 51. Stamatakis, A., *RAxML version 8: a tool for phylogenetic analysis and post-analysis of large*  
444 *phylogenies*. Bioinformatics, 2014. **30**(9): p. 1312-1313.

- 445 52. Worberg, A., et al., *Phylogeny of basal eudicots: Insights from non-coding and rapidly evolving DNA*.  
446 *Organisms Diversity & Evolution*, 2007. **7**(1): p. 55-77.
- 447 53. Wang, W., et al., *Phylogeny and classification of Ranunculales: Evidence from four molecular loci and*  
448 *morphological data*. *Perspectives in Plant Ecology, Evolution and Systematics*, 2009. **11**(2): p. 81-110.
- 449 54. Begum, H.J. and V. Ramamurthy, *Evaluation of secondary metabolites and antioxidant activity of*  
450 *ethanolic leaves extract of Tinospora Cordifolia*.
- 451 55. Deepika, P.L., et al., *Analgesic, Antiinflammatory Activity of Tinospora Cordifolia (Guduchi) and*  
452 *Valeriana Wallichii (Tagara) In Albino Rats*. *IOSR Journal of Pharmacy and Biological Sciences*, 2016.  
453 **Volume 11**(Issue 2 Ver. IV): p. 18-22.
- 454 56. Khanal, P., et al., *Network pharmacology-based assessment to elucidate the molecular mechanism of*  
455 *anti-diabetic action of Tinospora cordifolia*. *Clinical Phytoscience*, 2019. **5**(1).
- 456 57. Balkrishna, A., M.H. Kumar, and A.K. Gupta, *COMPARATIVE ANALYSIS OF HPTLC, SECONDARY*  
457 *METABOLITES AND ANTIOXIDANT ACTIVITIES OF TINOSPORA CORDIFOLIA STEM POWDERS*.  
458 *International Journal of Pharmaceutical Sciences and Research*, 2016. **7**(10): p. 4263-4271.
- 459 58. Mishra, A., S. Kumar, and A.K. Pandey, *Scientific validation of the medicinal efficacy of Tinospora*  
460 *cordifolia*. *The Scientific World Journal*, 2013. **2013**.
- 461 59. Borse, S., et al., *Ayurveda botanicals in COVID-19 management: An in silico multi-target approach*.  
462 *Plos one*, 2021. **16**(6): p. e0248479.
- 463 60. Sharma, U., et al., *Immunomodulatory active compounds from Tinospora cordifolia*. *Journal of*  
464 *ethnopharmacology*, 2012. **141**(3): p. 918-926.
- 465 61. Palmieri, A., et al., *Berberine and Tinospora cordifolia exert a potential anticancer effect on colon*  
466 *cancer cells by acting on specific pathways*. *International journal of immunopathology and*  
467 *pharmacology*, 2019. **33**: p. 2058738419855567.
- 468 62. Bhutada, P., et al., *Anticonvulsant activity of berberine, an isoquinoline alkaloid in mice*. *Epilepsy &*  
469 *Behavior*, 2010. **18**(3): p. 207-210.
- 470 63. Mostovoy, Y., et al., *A hybrid approach for de novo human genome sequence assembly and phasing*.  
471 *Nature methods*, 2016. **13**(7): p. 587-590.
- 472 64. Soltis, D., *Angiosperm phylogeny inferred from 18S rDNA, rbcL, and atpB sequences*. *Botanical*  
473 *Journal of the Linnean Society*, 2000. **133**(4): p. 381-461.
- 474 65. Yang, L., et al., *Phylogenomic Insights into Deep Phylogeny of Angiosperms Based on Broad Nuclear*  
475 *Gene Sampling*. *Plant Commun*, 2020. **1**(2): p. 100027.

476

477
